# Supplementary material for: Development and Validation of a Nausea Severity Scale for Assessment of Nausea in Children with Abdominal Pain-Related Functional Gastrointestinal Disorders
Source: PubMed Central journal article supplement (PMC6025273; doi:10.3390/children5060068), 2018-06-01
Supplement: children-05-00068-s001.pdf [file children-05-00068-s001.pdf]

### The Nausea Severity Scale (NSS)

1. In the last 2 weeks, how often have you had nausea (feeling like you might throw-up)?

- 0. Not at all
- 1. One or two days
- 2. Three or four days
- 3. Most days
- 4. Every day

2. In the last 2 weeks, how many times a day did you usually have the nausea?

- 0. None
- 1. Once a day
- 2. Two or three times a day
- 3. Four or more times a day
- 4. Constant during the day

3. In the last 2 weeks, when you had nausea, how long did it last?

- 0. No nausea
- 1. Less than 30 minutes
- 2. Half an hour to an hour
- 3. One to four hours
- 4. Most or all of the day

4. In the last 2 weeks, when you had the nausea, how much did you usually have?

No Nausea      1   2   3   4   5   6   7   8   9 The most nausea possible
